# Supplementary material
Source: PubMed Central journal article supplement (PMC4523333)
Supplement: bph0172-3748-sd1.pdf [file bph0172-3748-sd1.pdf]

**A**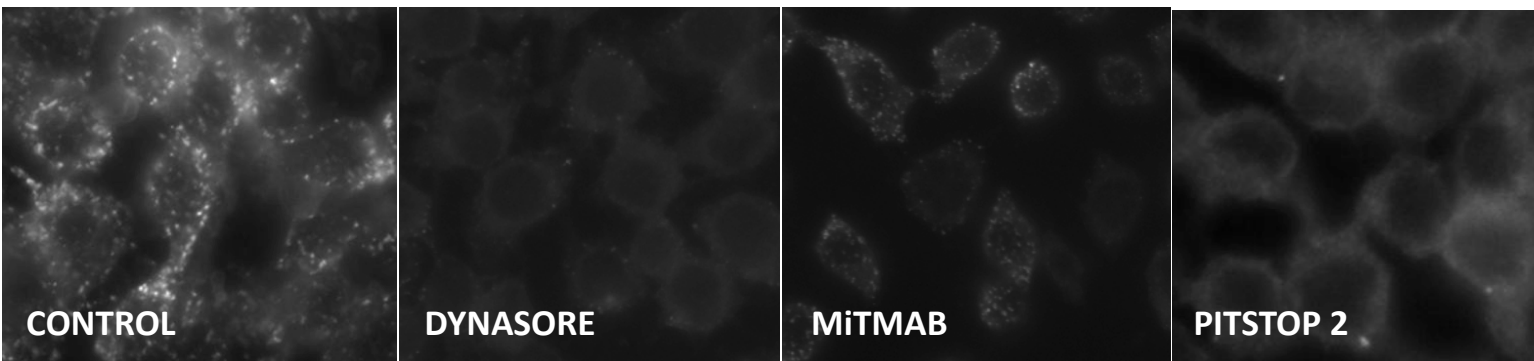**B**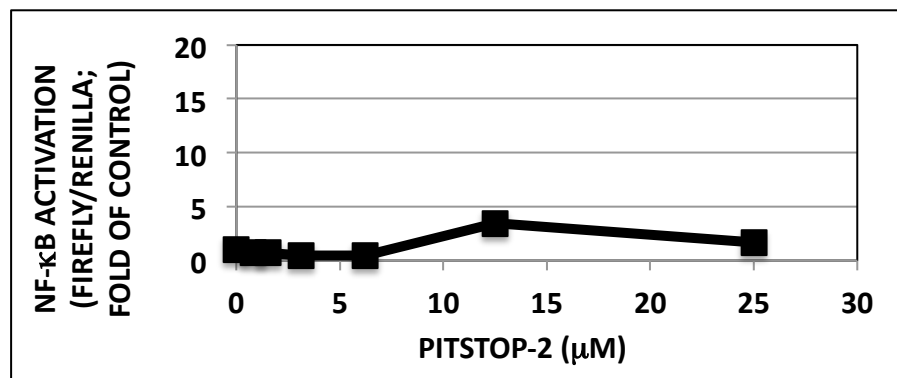**C**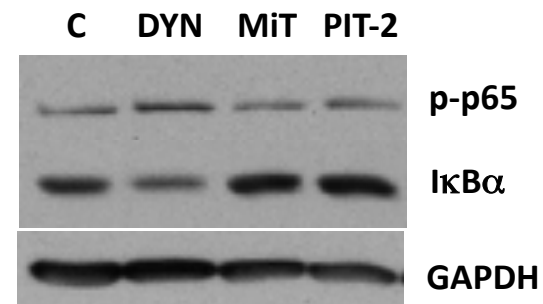**D**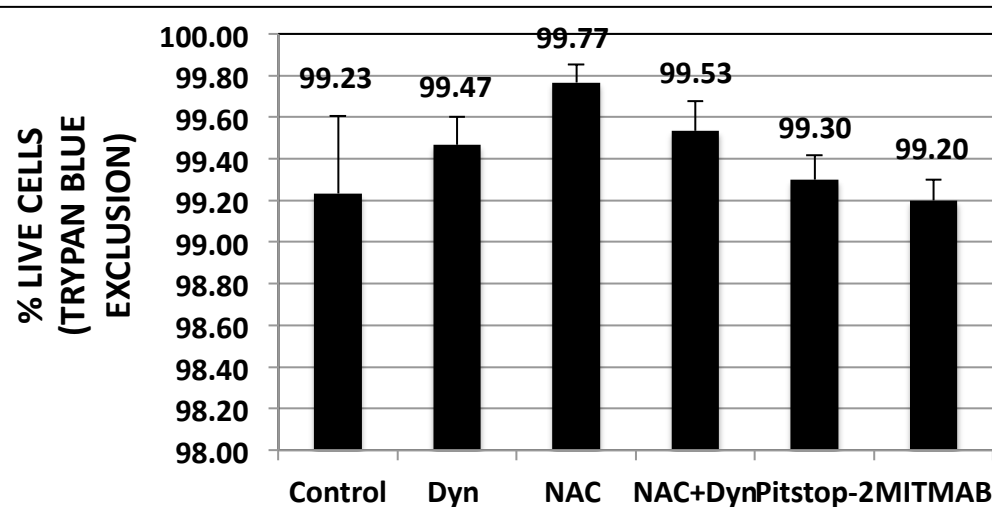**E**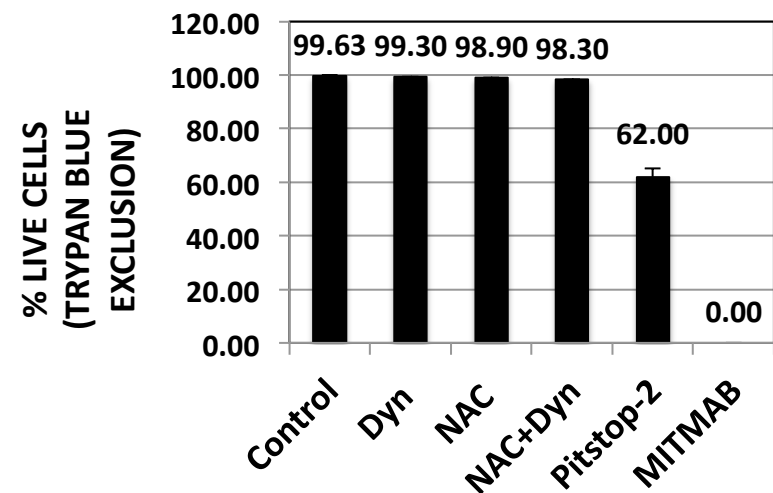

**FIGURE S1.** CME inhibitors prevent - Rhodamine- transferrin endocytosis but do not activate NF- $\kappa$ B p65 or I $\kappa$ B $\alpha$ ; Effect of inhibitors used in this study on cell viability. (A) Fluorescent microscopy: cells were treated for 15 min in HBSS with DMSO (Control), dynasore (80  $\mu$ M), MiTMAB (10  $\mu$ M) or Pitstop-2 (25  $\mu$ M). Cells were then allowed to bind Rhodamine- transferrin on ice, and transferred to 37<sup>0</sup>C for 5 min. (B) NF- $\kappa$ B- Luciferase: cells were treated with Pitstop-2 at the concentration indicated. (C) Western immunoblot: RAW cell were treated with DMSO (Control), dynasore (80  $\mu$ M), MiTMAB(10 $\mu$ M) or Pitstop-2 (25  $\mu$ M) for 2 h. Membranes were probed with p-p65, I $\kappa$ B $\alpha$ , and GAPDH antibodies. Note that only dynasore enhances p-p65 and induce degradation of I $\kappa$ B $\alpha$ . (D, E) Cell viability: Cell were treated with the inhibitors for 2 h (D) or 24 h (E) and subjected to trypan blue dye exclusion assay. Note that after 2 h exposure of all treatments, more than 99% of cells were viable. After 24 h exposure, dynasore and NAC treatment yielded more than 98% viable cells; Pitstop-2 yielded 62% viable cells; and after MiTMAB treatment, no viable cells were present.
