# Supplementary material
Source: PubMed Central journal article supplement (PMC4523333)
Supplement: bph0172-3748-sd2.pdf [file bph0172-3748-sd2.pdf]

**A**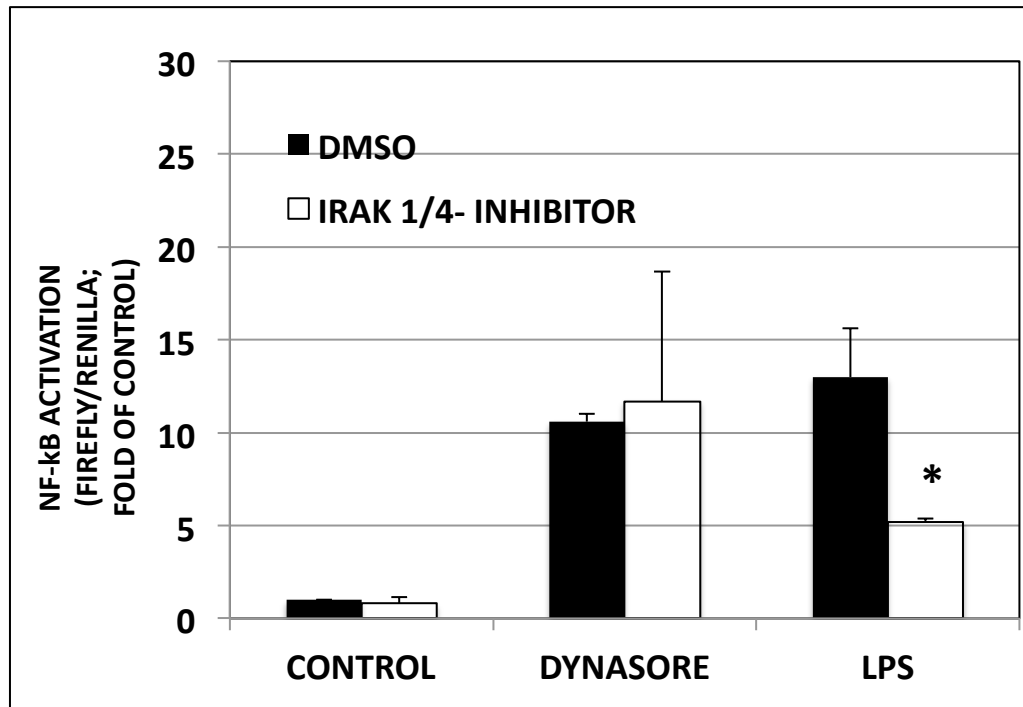**B**

Rotstein\_ Fig S2

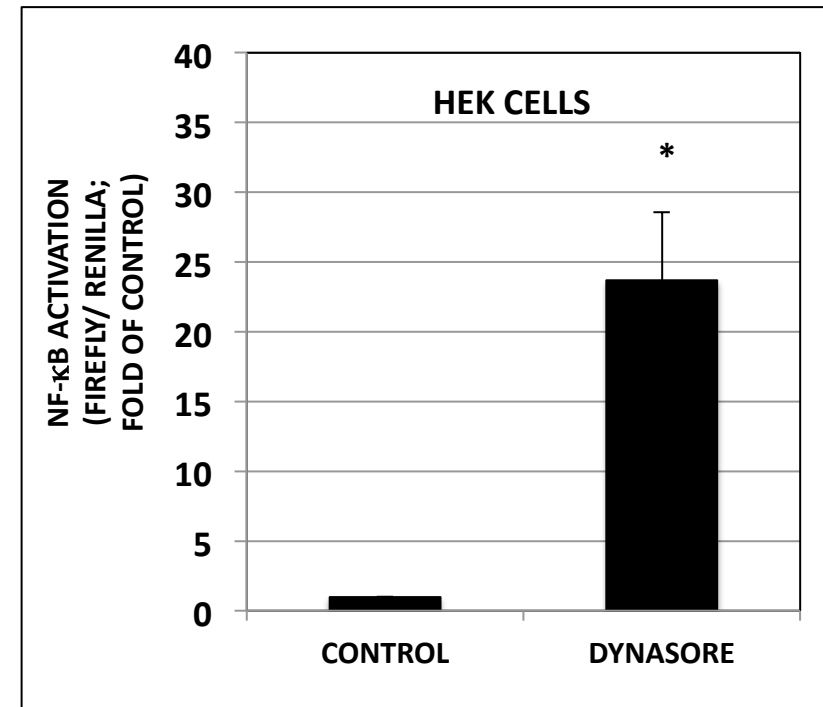

**FIGURE S2.** Dynasore effect is not through TLR4 pathway. (A) RAW cells co-transfected with NF- $\kappa$ B and Renilla luciferase plasmids were pre-incubated with IRAK 1/4- inhibitor (10 $\mu$ M) and dynasore (80 $\mu$ M) and incubated with or without the inhibitors and LPS (15ng mL<sup>-1</sup>) overnight. Note that while IRAK 1/4- inhibitor inhibits LPS-induced NF- $\kappa$ B luciferase activation, it does not affect dynasore-induced NF- $\kappa$ B luciferase activation. ANOVA- $p < 0.002$ ; DF within group = 12,  $n = 3$ . Asterisk denotes difference ( $p < 0.05$ ) between LPS and LPS+ IRAK 1/4- inhibitor. (B) HEK cells that do not express TLR4, respond to dynasore by activation of NF- $\kappa$ B, similar to RAW cells. Bars represent the mean plus SEM. Dynasore treatment is statistically different from DMSO-treated control ( $p < 0.009$ ;  $n = 3$ ).
