# Supplementary material
Source: PubMed Central journal article supplement (PMC4523333)
Supplement: bph0172-3748-sd5.pdf [file bph0172-3748-sd5.pdf]

**A**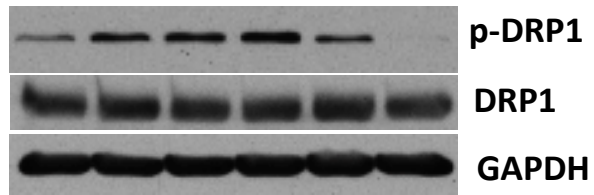

p-DRP1

DRP1

GAPDH

DYNASORE (min) 0 5 15 30 60 120

**B**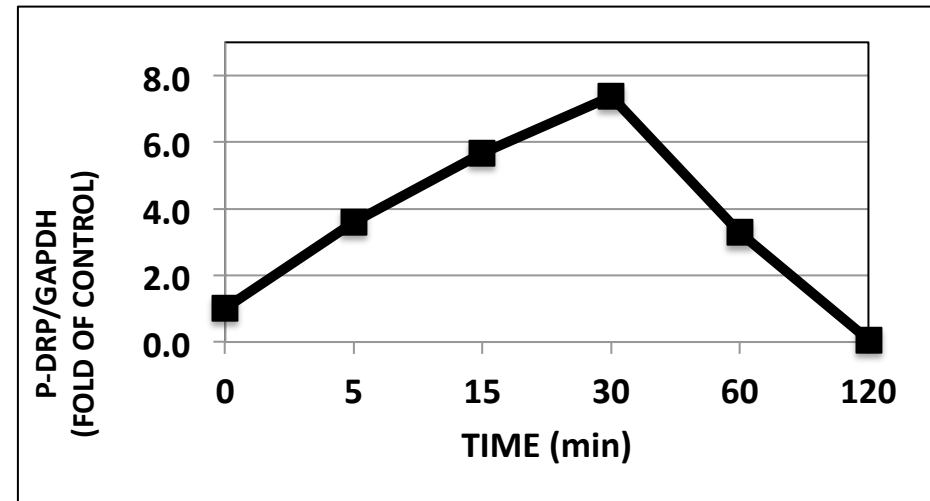P-DRP1/GAPDH  
(FOLD OF CONTROL)

TIME (min)

**C**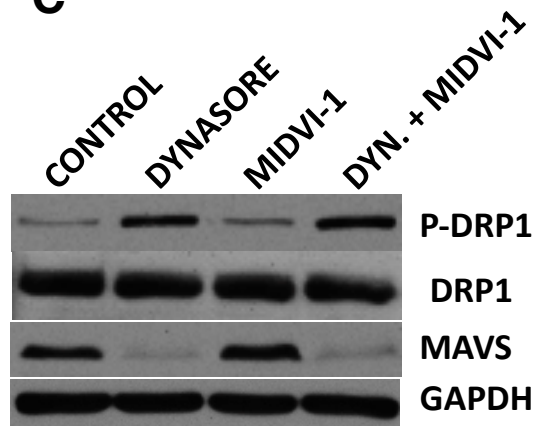

P-DRP1

DRP1

MAVS

GAPDH

**D**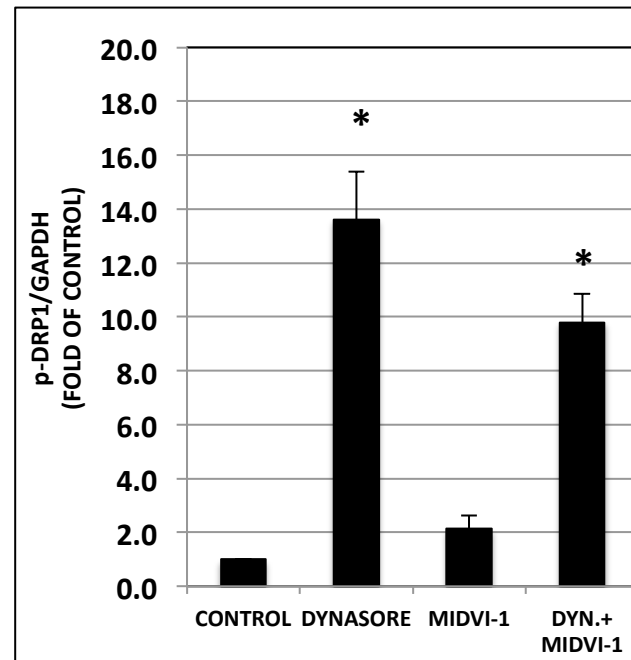P-DRP1/GAPDH  
(FOLD OF CONTROL)CONTROL DYNASORE MIDVI-1 DYN. +  
MIDVI-1**E**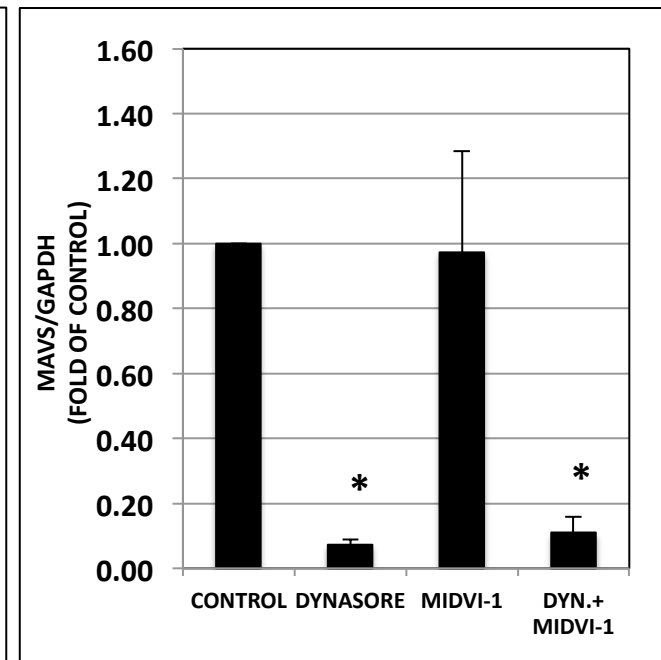MAVS/GAPDH  
(FOLD OF CONTROL)CONTROL DYNASORE MIDVI-1 DYN. +  
MIDVI-1

**FIGURE S5.** Dynasore causes phosphorylation of mitochondrial DRP1 on Ser 637; but dynasore's effect is not due to inhibition of DRP1 GTPase activity. (A) Western blot: cells were treated with 80 mM dynasore in HBSS for the times indicated. For loading correction, nitrocellulose membranes were re-probed with GAPDH or DRP1. (B) Bands in panel A were subjected to densitometry and expressed as ratio of p-DRP1/GAPDH. (C) Western blot showing that MIDVI-1 (10 mM; specific inhibitor of DRP1 GTPase activity) does not influence MAVS levels and DRP1 phosphorylation. (D, E) Densitometry of blots corrected to GAPDH and normalized to DMSO-treated control. ANOVA:  $p < 8 \times 10^{-5}$  for p-DRP1 and  $p < 0.04$  for MAVS; DF within groups = 9.
